# Supplementary material
Source: publisher figshare collection journal article supplement (https://acs.figshare.com/ndownloader/files/8998132)
Supplement: Supplementary file 1 [file 8998132]

## Supporting Information

for

# Pillar[5]arene-Based Supramolecular Plasmonic Thin Films for Label-free, Quantitative and Multiplex SERS Detection

Verónica Montes-García,<sup>†</sup> Borja-Gómez,<sup>‡</sup> Diego Martínez-Solís,<sup>§</sup> José M. Taboada,<sup>||</sup> Norman Jiménez-Otero,<sup>⊥</sup> Jacobo de Uña-Álvarez,<sup>⊥</sup> Fernando Obelleiro,<sup>§</sup> Luis García-Río,<sup>‡</sup> Jorge Pérez-Juste,<sup>\*,†</sup> Isabel Pastoriza-Santos<sup>\*,†</sup>

<sup>†</sup> Departamento de Química Física y CINBIO, Universidade de Vigo, 36310 Vigo, Spain

<sup>‡</sup> Centro Singular de Investigación en Química Biológica y Materiales Moleculares (CIQUS), Departamento de Química Física, Universidad de Santiago, 15782 Santiago, Spain.

<sup>§</sup> Departamento de Teoría de la Señal y Comunicaciones, Universidade de Vigo, 36310 Vigo, Spain

<sup>||</sup> Departamento Tecnología de los Computadores y de las Comunicaciones, Universidad de Extremadura, 10003 Cáceres, Spain

<sup>⊥</sup> Departamento de Estadística e Investigación Operativa, Facultad de Ciencias Económicas y Empresariales & CINBIO, Universidade de Vigo, 36310 Vigo, Spain

\* [juste@uvigo.es](mailto:juste@uvigo.es) and [pastoriza@uvigo.es](mailto:pastoriza@uvigo.es)

Pages S-1 through S-18

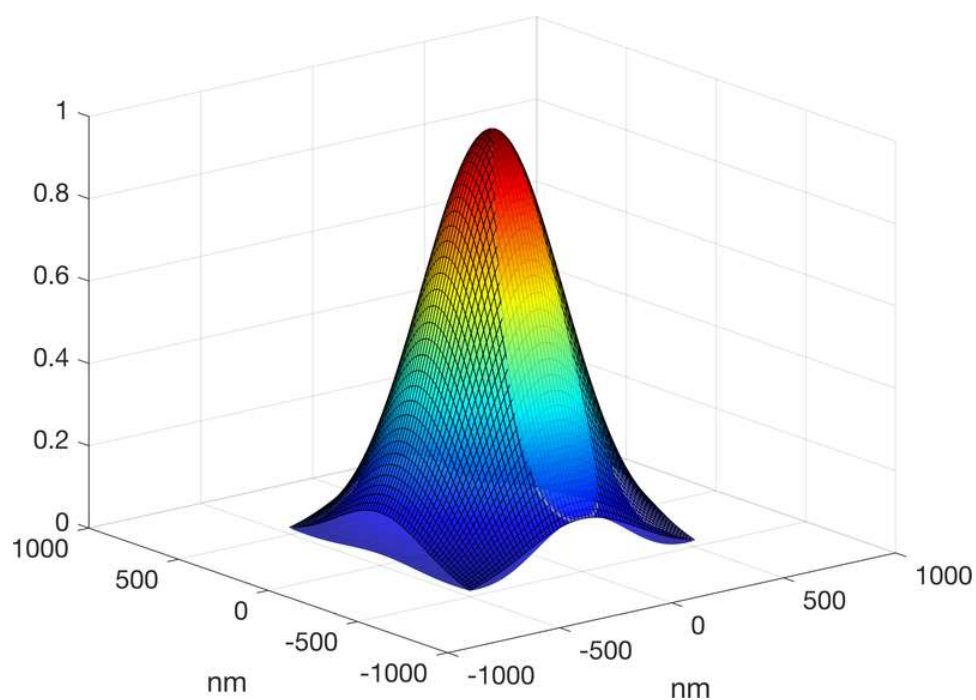

**Figure S1.** 2D Gaussian profile used to weight simulated SERS (gridded surface) and Gaussian beam with N.A. = 0.75 (color surface).

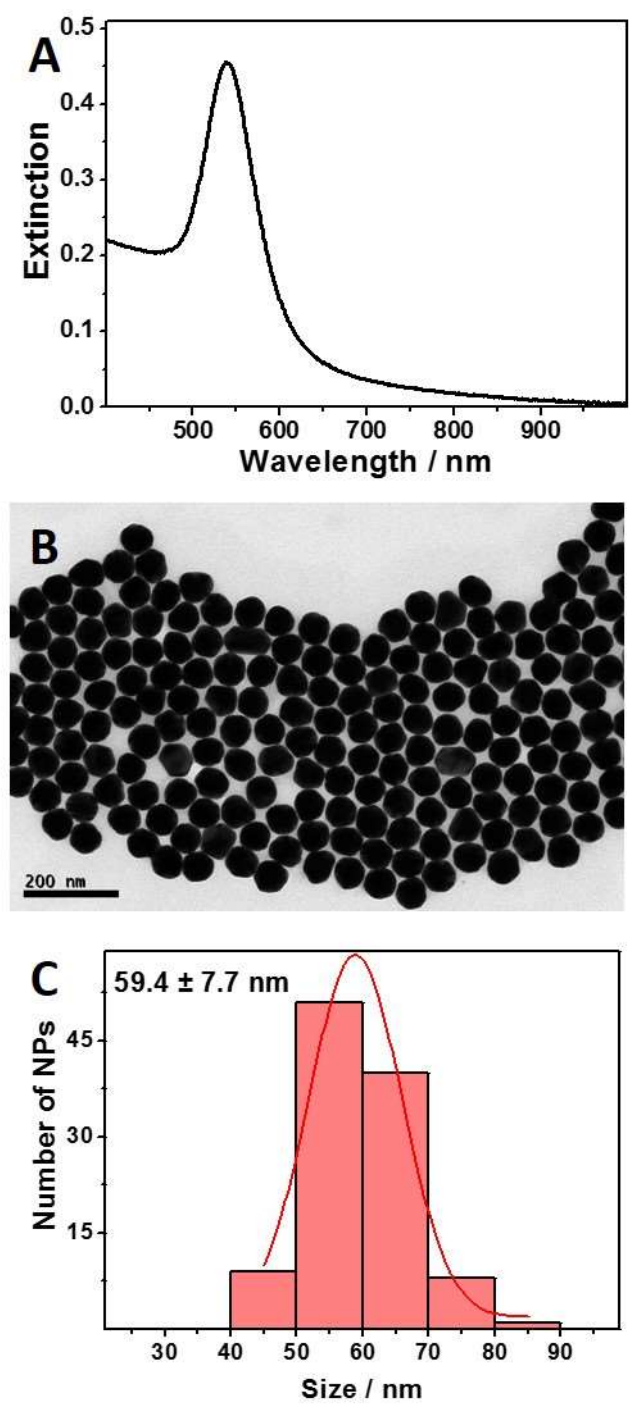

**Figure S2.** (A) Visible-NIR extinction spectrum of citrate-stabilized Au nanoparticles in water. (B) Representative TEM image. (C) Size distribution histogram obtained from TEM analysis.

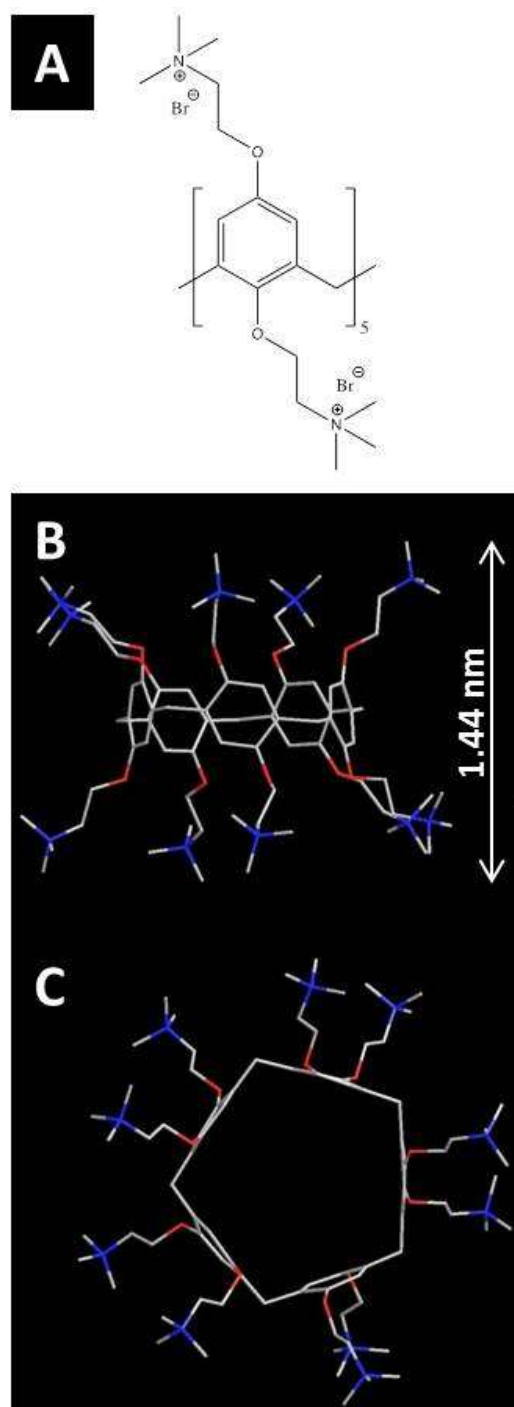

**Figure S3.** (A-C) Chemical structure of pillar[5]arene. (B) Side view and (C) upper view.

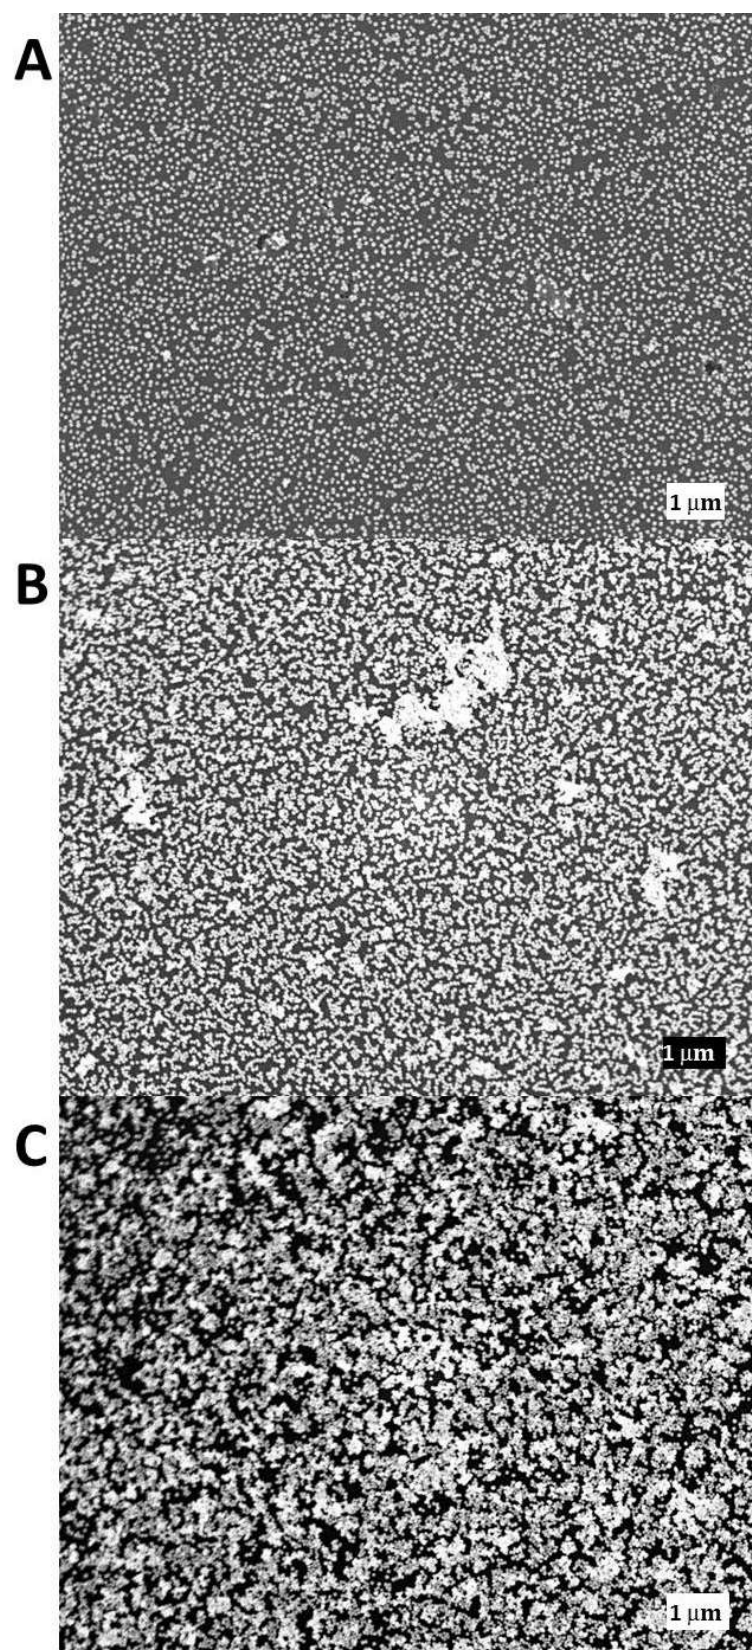

**Figure S4.** SEM images of AuNP-AP[5]A assemblies on positively charged PDDA modified glass obtained after different AuNP-AP[5]A depositions cycles: one **(A)**, two **(B)** and three **(C)**.

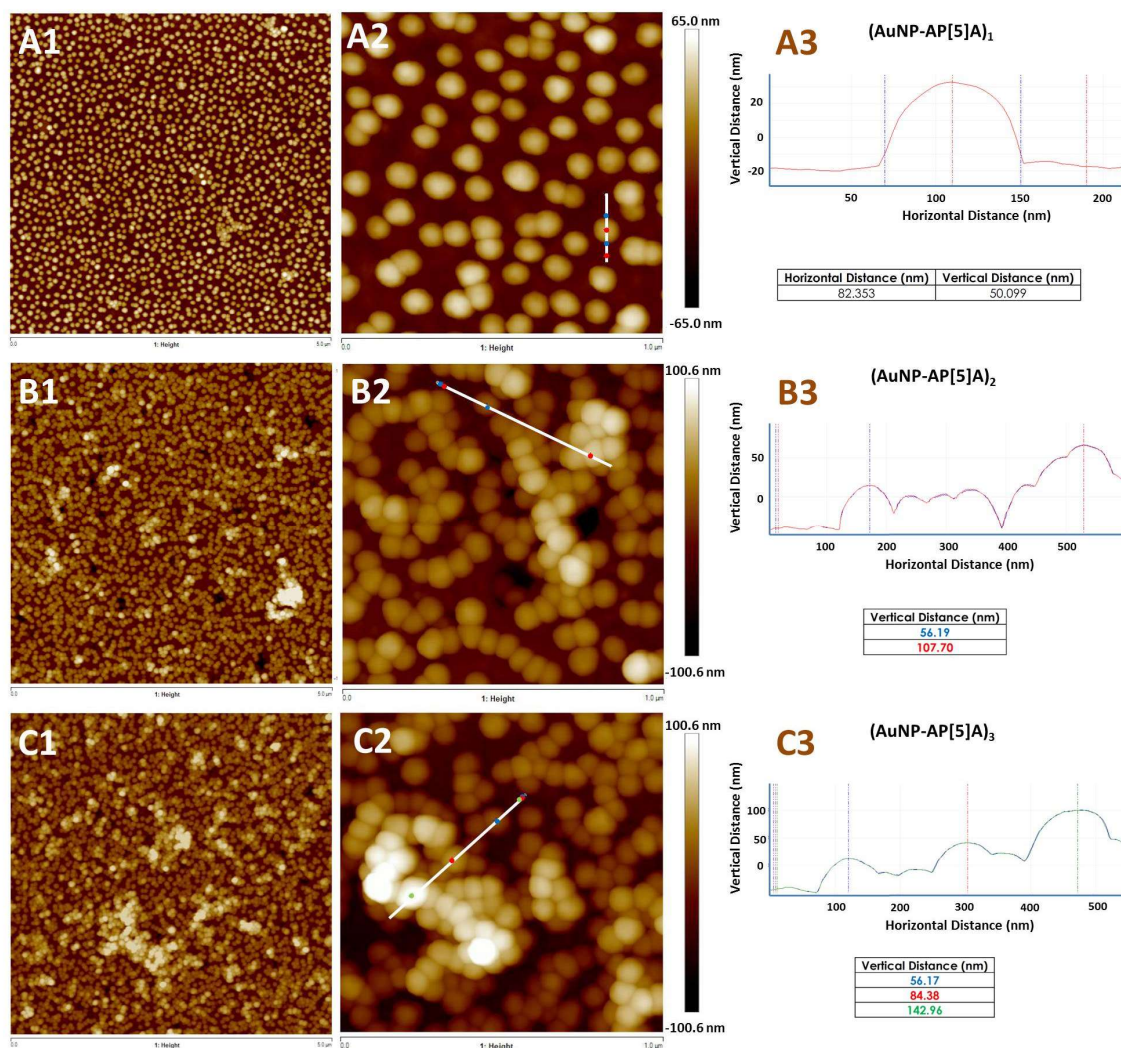

**Figure S5.** AFM topography images of the plasmonic substrates with one **(A)**, two **(B)** and three **(C)** AuNP-AP[5]A deposition cycles; namely (AuNP-AP[5]A)<sub>1</sub>, (AuNP-AP[5]A)<sub>2</sub> and (AuNP-AP[5]A)<sub>3</sub>, respectively. The plots in A3, B3 and C3 are cross sections of lines marked in the topography images of A2, B2 and C2, respectively.



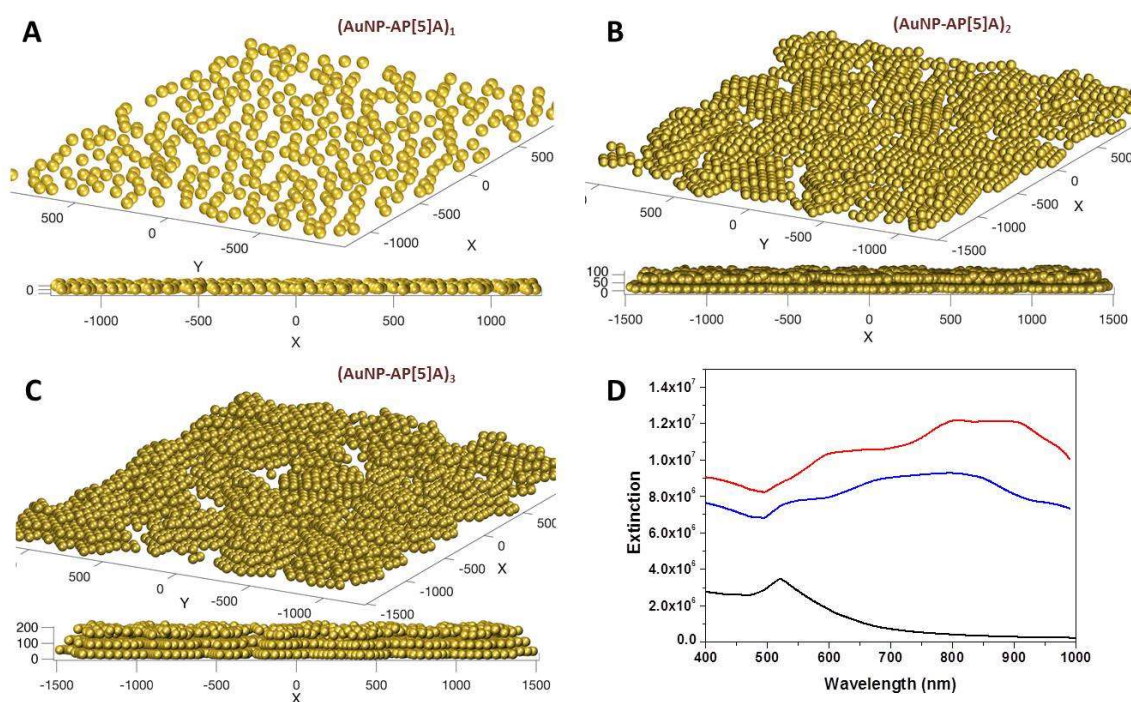

**Figure S6.** (A-C) Computer aided design (CAD) models of the different AuNP-AP[5]A assemblies employed for the simulation of extinction: (A)  $(\text{AuNP-AP[5]A})_1$ , (B)  $(\text{AuNP-AP[5]A})_2$  and (C)  $(\text{AuNP-AP[5]A})_3$ . The models were generated with 366, 1274 and 2926 Au spheres of 60 nm in diameter for  $(\text{AuNP-AP[5]A})_1$ ,  $(\text{AuNP-AP[5]A})_2$  and  $(\text{AuNP-AP[5]A})_3$ , respectively. (D) Calculated extinction spectra obtained using the  $M^3$  solver for  $(\text{AuNP-AP[5]A})_1$  (black),  $(\text{AuNP-AP[5]A})_2$  (blue) and  $(\text{AuNP-AP[5]A})_3$  (red).

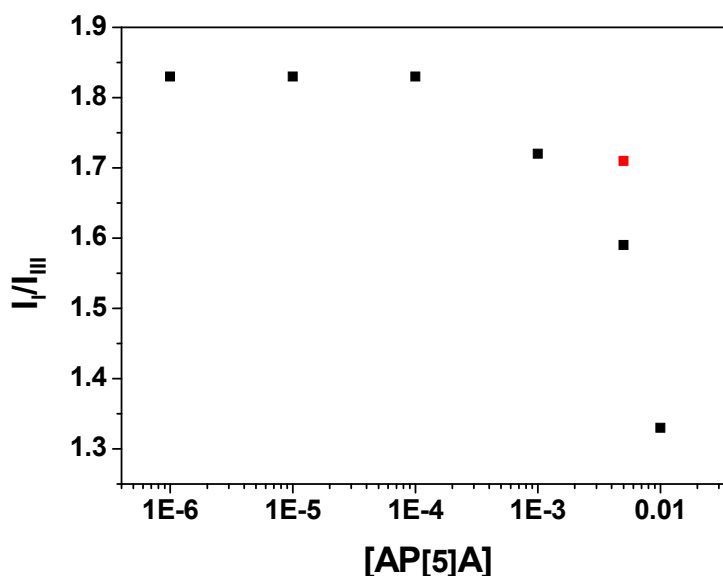

**Figure S7.** Band I:Band III intensity ratio ( $I_I/I_{III}$ ) corresponding to  $8 \times 10^{-7}$  M pyrene as a function of the concentration of pillar[5]arene. The red point is the experimental value obtained when a competitive guest such as sodium toluenesulfonate ( $5 \times 10^{-3}$  M) was added after the complexation of pyrene ( $8 \times 10^{-7}$  M) with pillar[5]arene ( $5 \times 10^{-3}$  M).

The host-guest interaction of macrocycles with guest molecules, such as PAH, is often analyzed by fluorescent spectroscopy. The emission of pyrene shows five mayor characteristic vibronic bands, Bands I, II, III, IV, V, at  $\sim 371$ ,  $379$ ,  $383$ ,  $395$  and  $410$  nm. Besides, it has been reported that Band I:Band III intensity ratio ( $I_I/I_{III}$ ) is strongly dependent of the polarity of the surrounding medium.<sup>(1)</sup> This polarity dependence has been used to study the interaction between pyrene and cyclodextrins. Thus, the  $I_I/I_{III}$  decreases from 1.8 in water to 0.6 when pyrene formed a host:guest complex with two cyclodextrin units.<sup>(2, 3)</sup> Based on that we have studied the host-guest complexation between pillar[5]arene and pyrene monitoring the evolution of the  $I_I/I_{III}$  of  $8 \times 10^{-7}$  M pyrene ( $\lambda_{ex} = 334$  nm;  $T = 25$  °C) with the concentration of pillar[5]arene. As shown in Figure S7 the  $I_I/I_{III}$  shows a remarkable decrease from 1.8 for pillar[5]arene concentrations higher than  $10^{-4}$  M achieving a value of 1.2 for concentrations of  $10^{-2}$  M. It is indicative of the host:guest interaction between the two entities. Finally, to the sample containing  $8 \times 10^{-7}$  M pyrene and  $5 \times 10^{-3}$  M pillar[5]arene ( $I_I/I_{III}$  of 1.59) we added a competitive guest,  $5 \times 10^{-3}$  M sodium toluenesulfonate, which produced an increase in the value to 1.71 (red point in Figure S7).



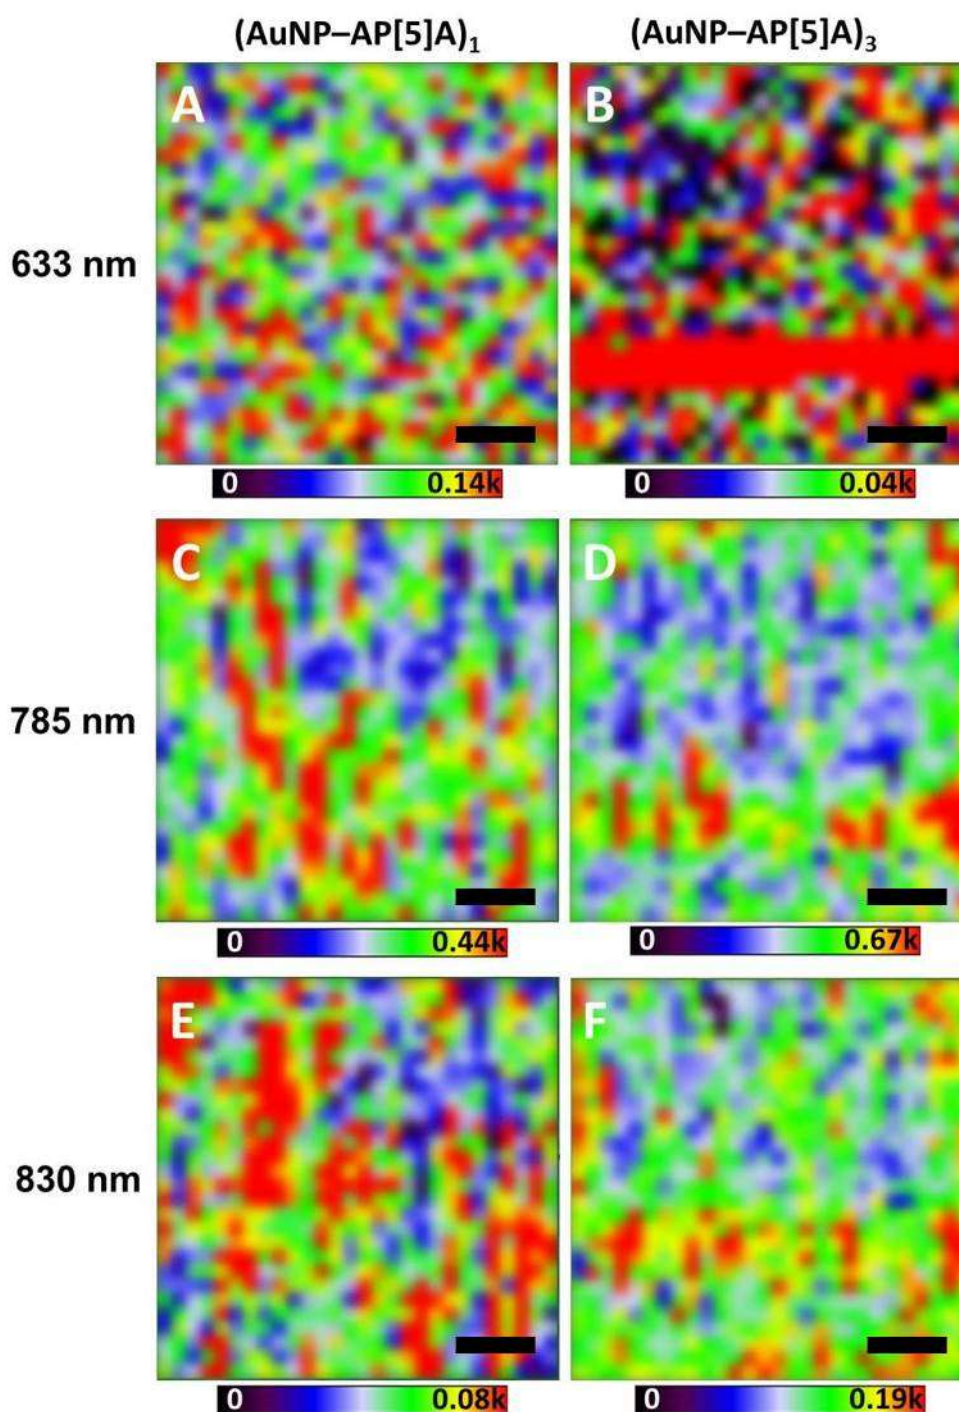

**Figure S8.** Representative SERS mappings obtained at  $594\text{ cm}^{-1}$  for  $(\text{AuNP-AP[5]A})_1$  (**A, C and E**) and  $(\text{AuNP-AP[5]A})_3$  (**B, D and F**) with 633 nm (**A and B**), 785nm (**C and D**) and 830 nm (**E and F**) excitation laser lines. Pyrene concentration was  $0.1\text{ }\mu\text{M}$ . All SERS measurements were carried out with a 50 x objective and a maximum power of  $43\text{ kWcm}^{-2}$ ,  $52\text{ kWcm}^{-2}$  and  $11\text{ kWcm}^{-2}$  for the 633, 785 and 830 nm laser lines, respectively. The acquisition time was 1 s. All scale bars represent  $20\text{ }\mu\text{m}$ .

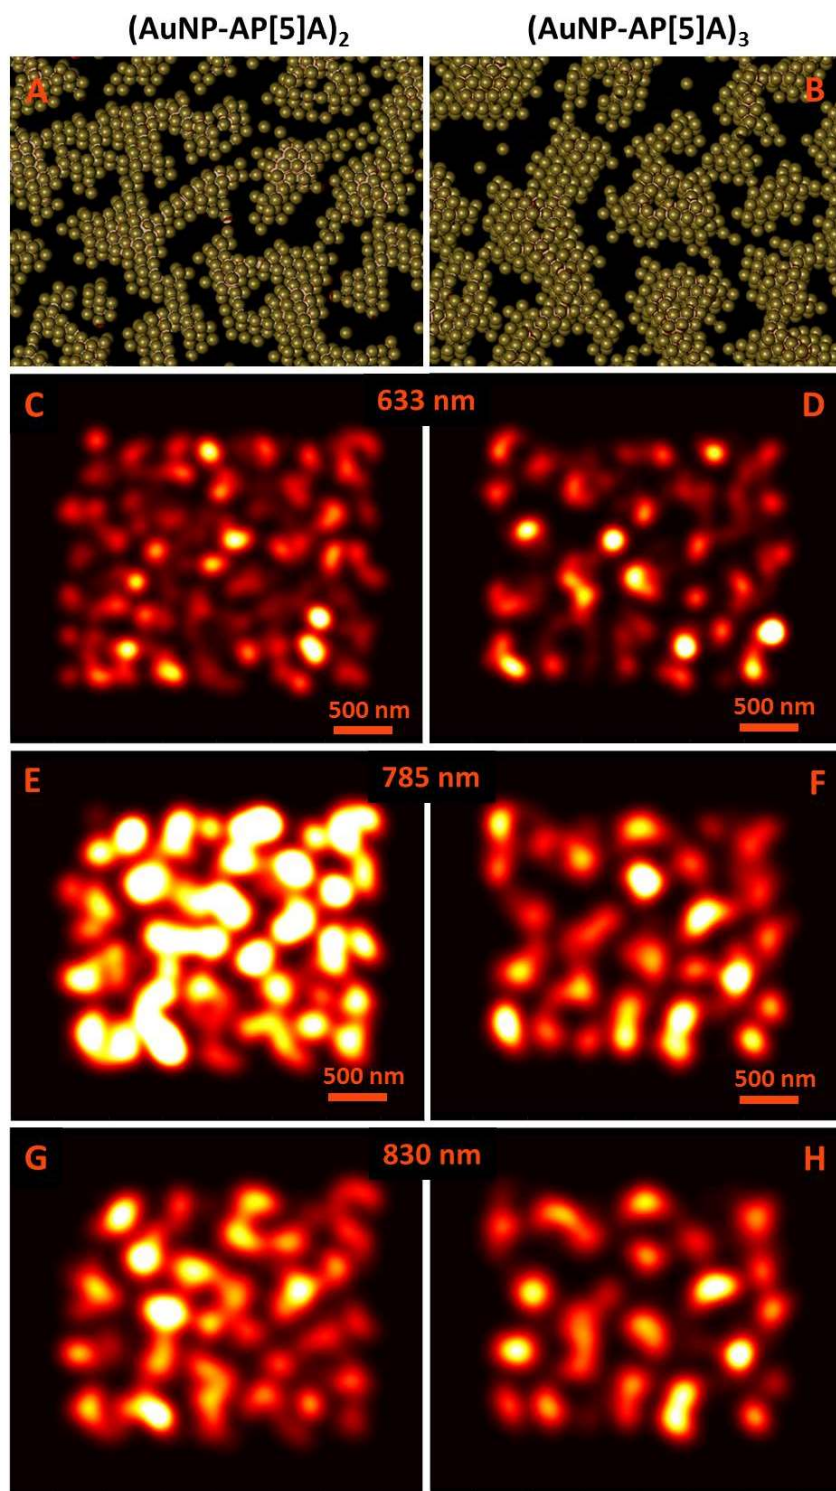

**Figure S9.** Simulated SERS mappings for  $(\text{AuNP-AP[5]A})_2$  and  $(\text{AuNP-AP[5]A})_3$  obtained with 633 nm, 785nm and 830 nm excitation wavelengths. SERS is calculated for zero Raman shift as  $|E/E_{\text{inc}}|^4$ . **(A-B)** Detailed geometry employed to obtain SERS on closed surfaces (skins) surrounding each nanoparticle, with a nanoparticle-to-molecule separation of 0.72 nm, consistent with the interparticle ligands. **(C-H)** Calculated SERS mappings depicting the weighted SERS for  $(\text{AuNP-AP[5]A})_2$  (**C, E, G**) and  $(\text{AuNP-AP[5]A})_3$  (**D, F, H**) and for the different excitation laser lines as indicated. The high-resolution SERS mappings are low-pass filtered through a Gaussian 2D profile with  $0.1 \lambda$  standard deviation (corresponding to N. A. = 0.75) to account for the lens diffraction, posing a more realistic picture.

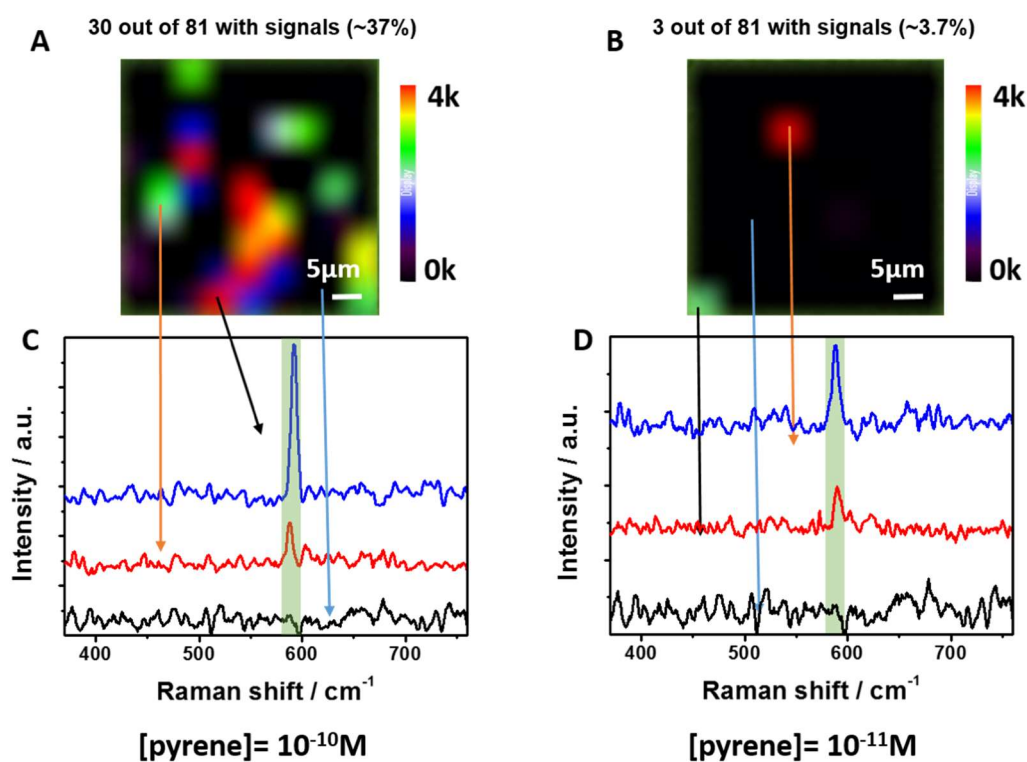

**Figure S10.** SERS mapping analysis of pyrene at  $595\text{ cm}^{-1}$  from  $10^{-10}\text{ M}$  (A) and  $10^{-11}\text{ M}$  (B) aqueous solutions. (C-D) SERS spectra obtained from the marked sites in the mapping data. The SERS spectrum of the substrate has been subtracted for clarity.

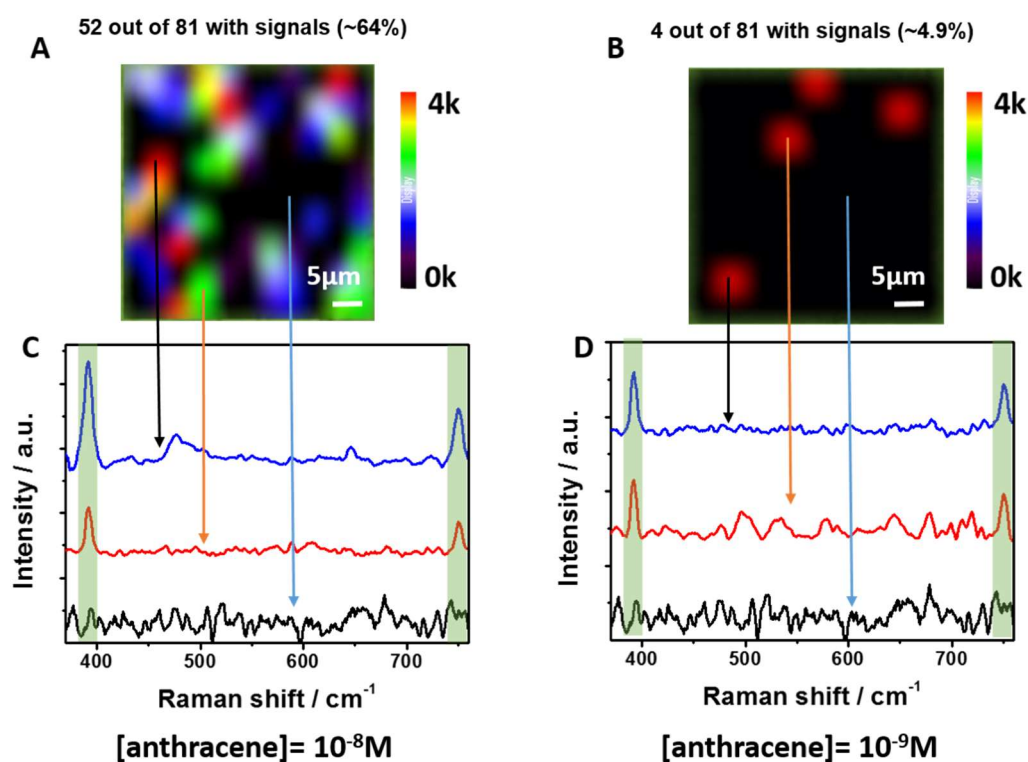

**Figure S11.** SERS mapping analysis of nitrophenyl at  $633\text{ cm}^{-1}$  from  $10^{-8}\text{ M}$  (A) and  $10^{-9}\text{ M}$  (B) aqueous solutions. (C-D) SERS spectra obtained from the marked sites in the mapping data. The SERS spectrum of the substrate has been subtracted for clarity.



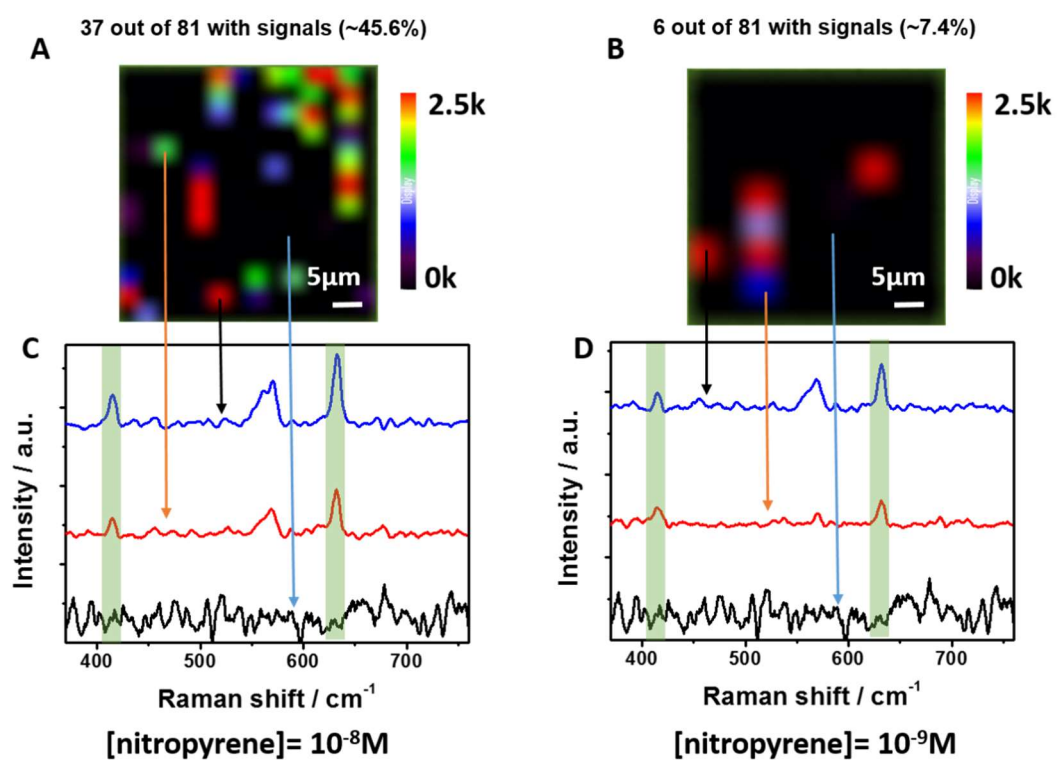

**Figure S12.** SERS mapping analysis of anthracene at  $395\text{ cm}^{-1}$  from  $10^{-8}\text{ M}$  (**A**) and  $10^{-9}\text{ M}$  (**B**) aqueous solutions. (**C-D**) SERS spectra obtained from the marked sites in the mapping data. The SERS spectrum of the substrate has been subtracted for clarity.

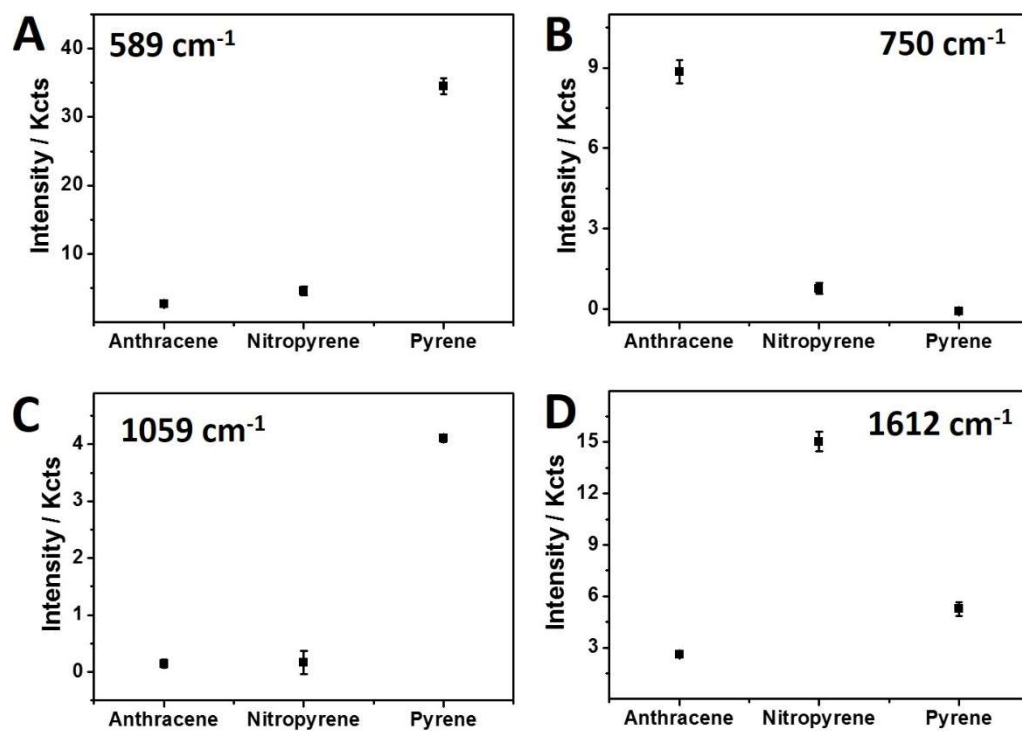

**Figure S13. (A-D)** Exploratory boxplots for the most relevant Raman shift 589 cm<sup>-1</sup> **(A)**, 750 cm<sup>-1</sup> **(B)** 1059 cm<sup>-1</sup> **(C)** and 1612 cm<sup>-1</sup> **(D)** to differentiate the three studied PAH in a mixture.



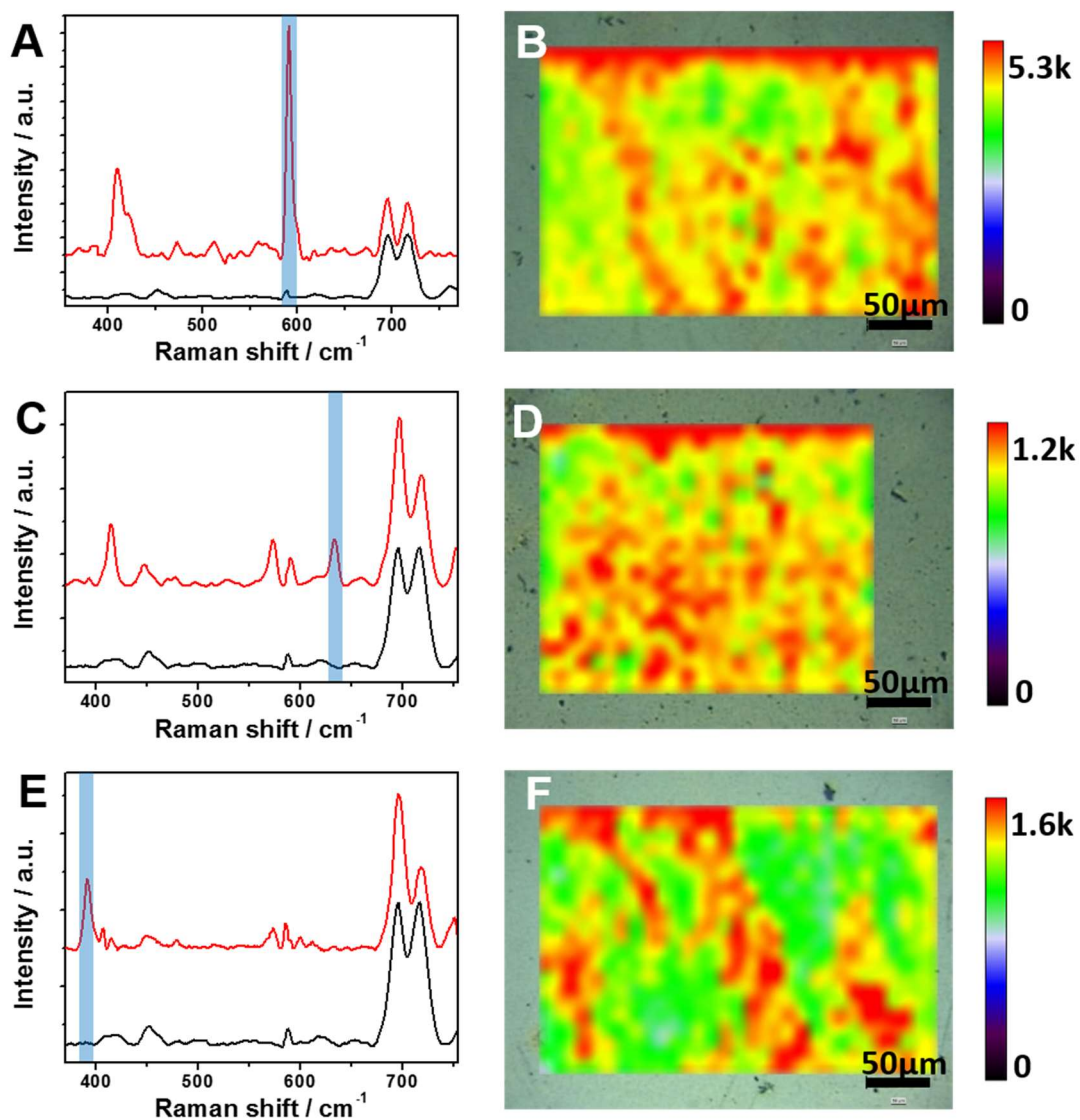

**Figure S14.** SERS spectra of pyrene (A), nitropyrene (C) and anthracene (E) obtained from gas-phase experiment. The SERS spectrum of the substrate has not been subtracted therefore it has been included in the graphs (black spectra). SERS intensity mappings of pyrene (B) at 594  $\text{cm}^{-1}$ , nitropyrene (D) at 633  $\text{cm}^{-1}$ , and anthracene (F) at 395  $\text{cm}^{-1}$ . An excitation laser line at 785 nm was used for all measurements.

**Table S1.** Summary of the vibrational band assignments for pyrene, 1-nitropyrene and anthracene.

| Pyrene                                                                            |                           | 1-Nitropyrene                                                                     |                                                            | Anthracene                                                                          |                          |
|-----------------------------------------------------------------------------------|---------------------------|-----------------------------------------------------------------------------------|------------------------------------------------------------|-------------------------------------------------------------------------------------|--------------------------|
| 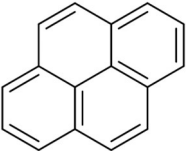 |                           |  |                                                            |  |                          |
| Raman shift / $\text{cm}^{-1}$                                                    | Assignment                | Raman shift / $\text{cm}^{-1}$                                                    | Assignment                                                 | Raman shift / $\text{cm}^{-1}$                                                      | Assignment               |
| 1614                                                                              | Ring C=C stretching (4)   | 1614                                                                              | C-C stretching (5, 6)                                      | 1661                                                                                |                          |
| 1401                                                                              | Ring C=C stretching (4)   | 1404                                                                              | C-C stretching (5)                                         | 1543                                                                                | C-C stretching (7, 8)    |
| 1235                                                                              | Ring C=C stretching (4,5) | 1236                                                                              | C-C stretching / C-H in-plane bending (5)                  | 1393                                                                                | Ring stretching (7)      |
| 1139                                                                              | CH bending (4)            | 1151                                                                              | C-H in-plane bending (5)                                   | 1175                                                                                | C-C stretching (7)       |
| 1060                                                                              | CH bending (4)            | 1036                                                                              | C-H in-plane bending (5)                                   | 1154                                                                                | C-C stretching (7)       |
| 590                                                                               | Ring breathing (4)        | 633                                                                               | NO <sub>2</sub> in-plane bending (5)<br>Ring breathing (6) | 1031                                                                                |                          |
| 407                                                                               | Ring deformation (4)      | 416                                                                               | Skeletal stretching (5)<br>Ring deformation (6)            | 1004                                                                                | C-C stretching (7)       |
|                                                                                   |                           | 357                                                                               | Skeletal stretching (5)<br>Ring deformation (6)            | 750                                                                                 | Stretching (7)           |
|                                                                                   |                           |                                                                                   |                                                            | 479                                                                                 | Skeletal deformation (7) |
|                                                                                   |                           |                                                                                   |                                                            | 392                                                                                 | Skeletal deformation (7) |

**Table S2.** Summary of SERS detection limits reported for the three PAH studied.

| Detection platform                          | PAH/LOD                                                               | Reference |
|---------------------------------------------|-----------------------------------------------------------------------|-----------|
| Au colloids                                 | Pyrene/ $4.4 \times 10^{-8}$ M<br>Anthracene/ $1.8 \times 10^{-9}$ M  | (9)       |
| Au NPs coupled film                         | Pyrene/ $6.3 \times 10^{-8}$ M                                        | (10)      |
| Fe <sub>3</sub> O <sub>4</sub> @Au colloids | Pyrene/ $5.0 \times 10^{-8}$ M<br>Anthracene/ $5.0 \times 10^{-8}$ M  | (11)      |
| Pillar[5]arene-functionalized Au colloids   | Pyrene/ $1.0 \times 10^{-8}$ M                                        | (4)       |
| Dithiocarbamate-functionalized Ag colloids  | Pyrene/ $1.0 \times 10^{-8}$ M                                        | (12)      |
| Au NPs on polymeric platforms               | Pyrene/ $1.1 \times 10^{-7}$ M<br>Anthracene/ $0.93 \times 10^{-7}$ M | (13)      |
| Ag-doped filter paper                       | Nitropyrene/ $2.0 \times 10^{-4}$ M                                   | (14)      |
| Silver cavities                             | Anthracene/ $8 \times 10^{-9}$ M<br>Pyrene/ $4 \times 10^{-8}$        | (8)       |
| Ag coated spheres on glass                  | Nitropyrene/ $10^{-6}$ M                                              | (15)      |

## References.

1. Kalyanasundaram, K.; Thomas, J. K. Environmental Effects on Vibronic Band Intensities in Pyrene Monomer Fluorescence and their Application in Studies of Micellar Systems. *J. Am. Chem. Soc.* **1977**, *99*, 2039-2044.
2. Muñoz de la Peña, A.; Ndou, T.; Zung, J. B.; Warner, I. M. Stoichiometry and Formation Constants of Pyrene Inclusion Complexes with Beta- and Gamma-Cyclodextrin. *J. Phys. Chem.* **1991**, *95*, 3330-3334.
3. Dyck, A. S. M.; Kisiel, U.; Bohne, C. Dynamics for the Assembly of Pyrene- $\gamma$ -Cyclodextrin Host-Guest Complexes. *J. Phys. Chem. B* **2003**, *107*, 11652-11659, and references therein.
4. Montes-García, V.; Fernández-López, C.; Gómez, B.; Pérez-Juste, I.; García-Río, L.; Liz-Marzán, L. M.; Pérez-Juste, J.; Pastoriza-Santos, I. Pillar[5]Arene-Mediated Synthesis of Gold Nanoparticles: Size Control and Sensing Capabilities. *Chem. Eur. J.* **2014**, *20*, 8404-8409.
5. Carrasco, E. A.; Campos-Vallette, M.; Leyton, P.; Diaz G.; Clavijo, R. E.; García-Ramos J. V.; Inostroza N.; Domingo, C.; S. Sanchez-Cortes, S.; Koch, R. Study of the Interaction of Pollutant Nitro Polycyclic Aromatic Hydrocarbons with Different Metallic Surfaces by Surface-Enhanced Vibrational Spectroscopy (SERS and SEIR). *J. Phys. Chem. A* **2003**, *107*, 9611-9619.
6. Carrasco-Flores, E. A.; Clavijo, R. E.; Campos-Vallette, M. M.; Aroca R. F. Vibrational Spectra and Surface-Enhanced Vibrational Spectra of 1-Nitropyrene. *Appl. Spectrosc.* **2004**, *58*, 555-561.
7. Qu, L.-L.; Li, Y.-T.; Li, D.-W.; Xue, J.-Q.; Fossey, J. S.; Long, Y.-T. Humic acids-based one-step fabrication of SERS substrates for detection of polycyclic aromatic hydrocarbons. *Analyst* **2013**, *138*, 1523-1528.
8. Gu, X.; Tian, S.; Zhou, Q.; Adkins, J.; Gu, Z.; Li, X.; Zheng, J. SERS detection of polycyclic aromatic hydrocarbons on a bowl-shaped silver cavity substrate. *RSC Adv.* **2013**, *3*, 25989-25996.
9. Shi, X.; Liu, S.; Han, X.; Ma, J.; Jiang, Y.; Yu, G. High-Sensitivity Surface-Enhanced Raman Scattering (SERS) Substrate Based on a Gold Colloid Solution with a pH Change for Detection of Trace-Level Polycyclic Aromatic Hydrocarbons in Aqueous Solution. *Appl. Spectrosc.* **2015**, *69*, 574-579.
10. Gu, H. X.; Hu, K.; Li, D. W.; Long, Y. T. SERS detection of polycyclic aromatic hydrocarbons using a bare gold nanoparticles coupled film system. *Analyst* **2016**, *141*, 4359-4365.
11. Du, J. J.; Xu, J. W.; Sun, Z. L.; Jing, C. Y. Au nanoparticles grafted on Fe<sub>3</sub>O<sub>4</sub> as effective SERS substrates for label-free detection of the 16 EPA priority polycyclic aromatic hydrocarbons. *Anal. Chim. Acta* **2016**, *915*, 81-89.
12. Guerrini, L.; Garcia-Ramos, J. V.; Domingo, C.; Sanchez-Cortes, S. Sensing Polycyclic Aromatic Hydrocarbons with Dithiocarbamate-Functionalized Ag Nanoparticles by Surface-Enhanced Raman Scattering. *Anal. Chem.* **2009**, *81*, 953-960.
13. Wang, X.; Hao, W.; Zhang, H.; Pan, Y.; Kang, Y.; Zhang, X.; Zou, M.; Tong, P.; Du, Y. Analysis of polycyclic aromatic hydrocarbons in water with gold nanoparticles decorated hydrophobic porous polymer as surface-enhanced Raman spectroscopy substrate. *Spectrochim. Acta Part A* **2015**, *139*, 214-221.
14. Laserna, J.J.; Campiglia, A.D.; Winefordner, J.D. Mixture Analysis and Quantitative-Determination of Nitrogen-Containing Organic-Molecules by Surface-Enhanced Raman Spectrometry. *Anal. Chem.* **1989**, *61*, 1697-1701.
15. Enlow, P. D.; Buncick, M.; Warmack, R. J.; Vo-Dinh, T. Detection of Nitro Polynuclear Aromatic-Compounds by Surface-Enhanced Raman-Spectrometry. *Anal. Chem.* **1986**, *58*, 1119-1123.
